# Supplementary material for: Solvothermal synthesis of carbon nitride (g-C3N4): bandgap engineering for improved photocatalytic performance
Source: Royal Society of Chemistry journal article supplement (doi:10.1039/d4se01646g), 2024-12-27
Supplement: d4se01646g1.pdf [file d4se01646g1.pdf]

## Solvothermal Synthesis of Carbon Nitride (C<sub>3</sub>N<sub>4</sub>): Bandgap Engineering for Improved Photocatalytic Performance

Mohammed Tajudeen Abdullahi<sup>1</sup>, Maryum Ali<sup>2</sup>, Wasif Farooq,<sup>3</sup> Majad Khan,<sup>1,2</sup> Muhammad Younas,<sup>4</sup> and Muhammad Nawaz Tahir<sup>1,2\*</sup>

<sup>1</sup>Mohammed Tajudeen Abdullahi, Dr. Majad Khan, Dr. Maryum Ali, Dr. Muhammad Nawaz Tahir\*

<sup>1</sup>Chemistry Department, King Fahd University of Petroleum & Minerals, Dhahran 31261, Kingdom of Saudi Arabia.

<sup>2</sup>Interdisciplinary Research Centre for Hydrogen Technologies and Carbon Management (IRC-HTCM), King Fahd University of Petroleum & Minerals, Dhahran 31261, Saudi Arabia

<sup>3</sup>Dr. Wasif Farooq

Chemical Engineering Department, King Fahd University of Petroleum & Minerals, Dhahran 31261, Kingdom of Saudi Arabia.

<sup>4</sup>Dr. Muhammad Younas

Core Research Facilities (CRF), King Fahd University of Petroleum and Minerals (KFUPM), Dhahran, 31261, Saudi Arabia

**Corresponding Author: Dr. Muhammad Nawaz Tahir**, Email : [muhammad.tahir@kfupm.edu.sa](mailto:muhammad.tahir@kfupm.edu.sa).

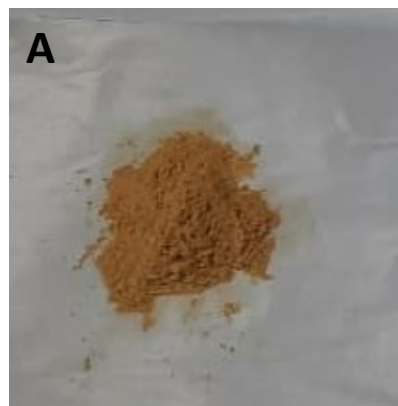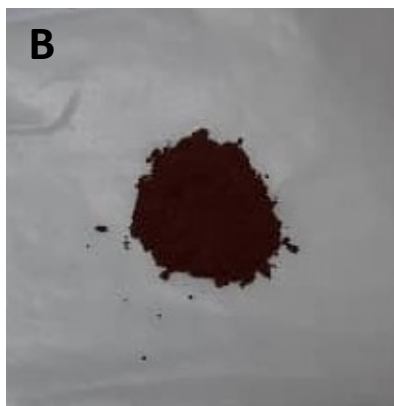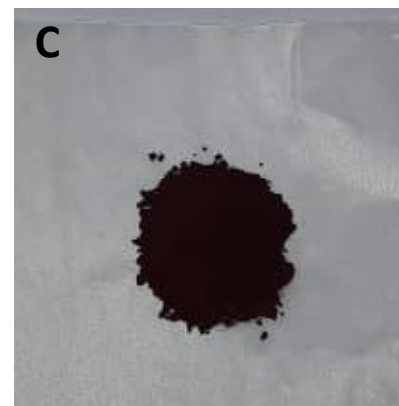

**Figure S1.** Powder samples of the synthesized  $g\text{-C}_3\text{N}_4$  obtained through heating at different temperatures (A) 160 °C, yellow (B) 180 °C, orange and (C) 200 °C, brick red.

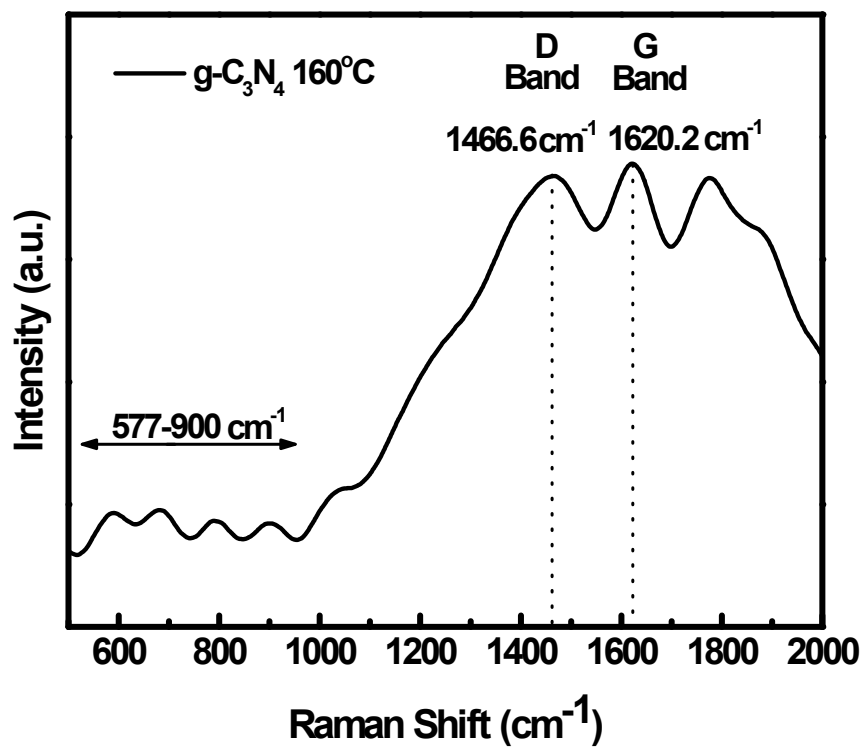

**Figure S2.** Raman spectra of g-C<sub>3</sub>N<sub>4</sub> synthesized through heating at 160 °C.

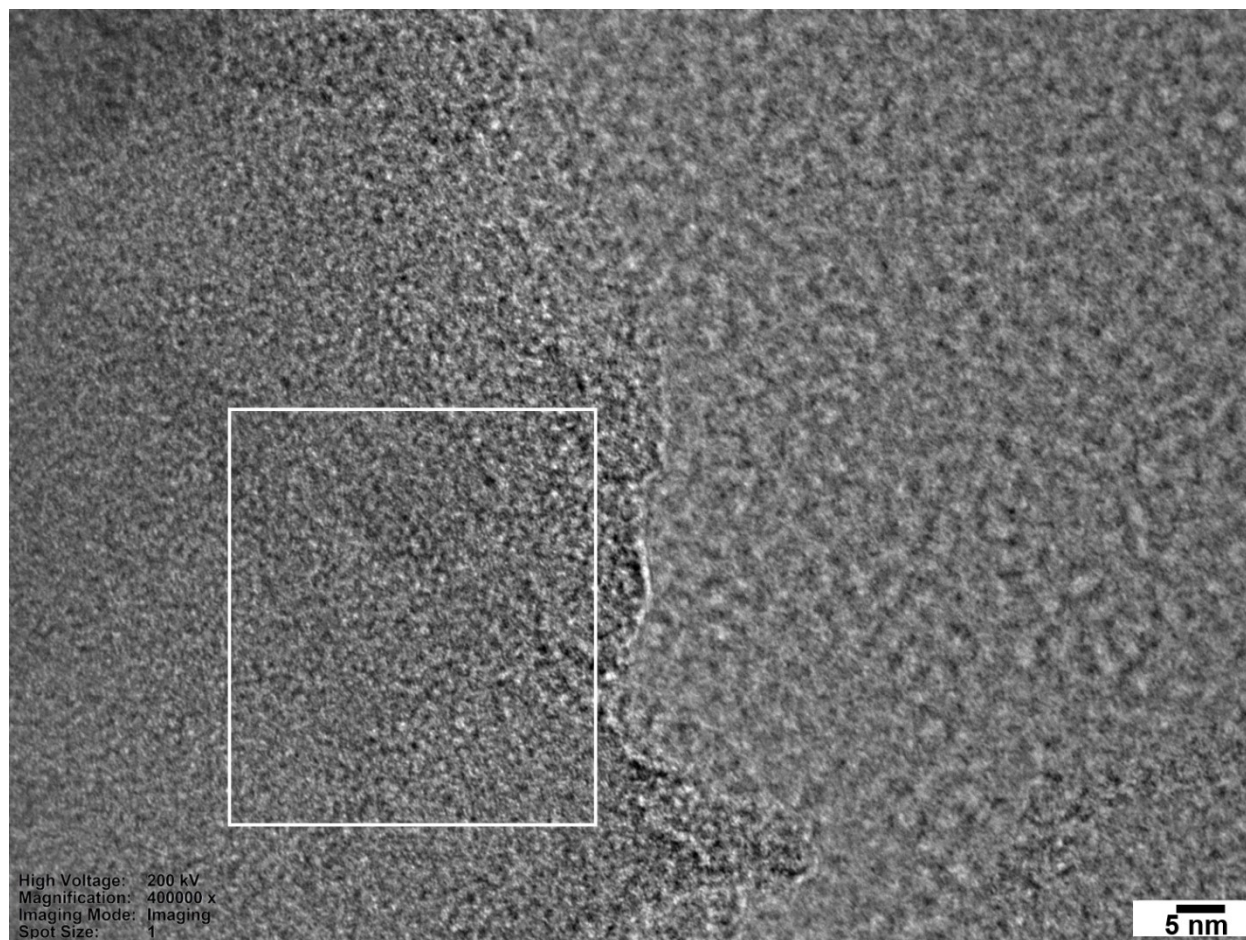

**Figure s3:** HRTEM image collected from sample synthesized at 160 °C, indicating some small domains with low low-scale ordering of layers.

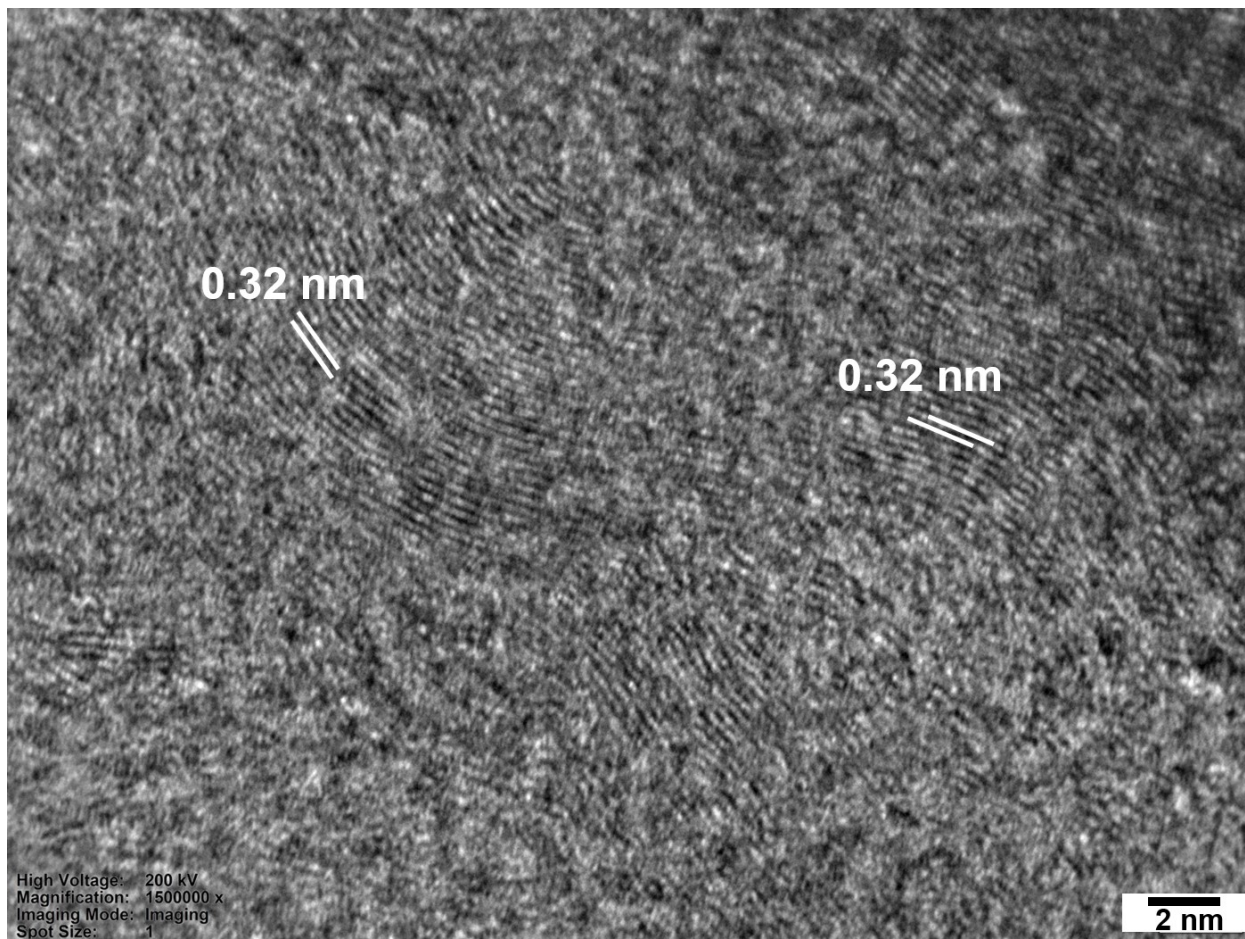

**Figure s4:** HRTEM image for the sample synthesized at 200 °C, indicating well-defined layered morphology with interlayer d-spacing 0.32 nm corresponding to the (002) reflection.

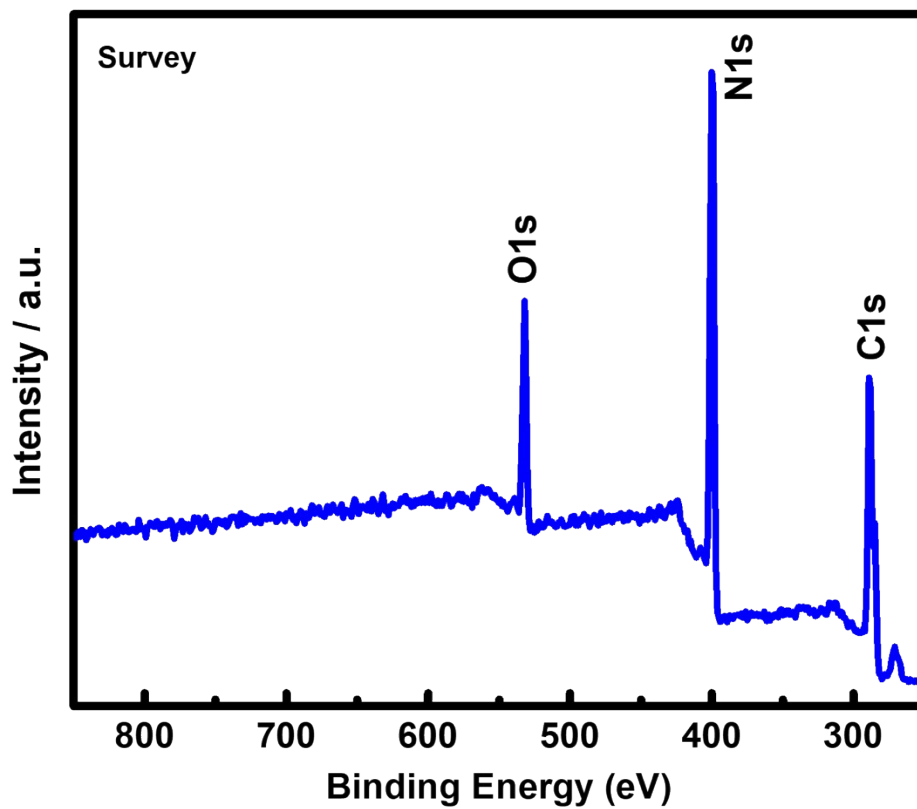

**Figure S5.** XPS Survey scan spectra of g-C<sub>3</sub>N<sub>4</sub> synthesized through heating at 200 °C.
